# Supplementary material
Source: PubMed Central journal article supplement (PMC2948579)
Supplement: NIHMS231630-supplement-2_si_002.pdf [file NIHMS231630-supplement-2_si_002.pdf]

## Supporting Information

**Supporting Information Table 1.** Table of theoretical and measured b- and y-type ions, from the MS/MS spectrum shown in Figure 2B. The table was used for manual *de novo* sequencing of *V. vulgaris* peptide HGEYAM\*SIYNPLVDVWHLR as a triply-charged precursor. \*indicates oxidation.

| Singly-charged b-ions <i>m/z</i> observed | Singly-charged b-ions <i>m/z</i> predicted |    |      |    | Singly-charged y-ions <i>m/z</i> predicted | Singly-charged y-ions <i>m/z</i> observed |
|-------------------------------------------|--------------------------------------------|----|------|----|--------------------------------------------|-------------------------------------------|
|                                           | 138.067                                    | 1  | His  | 20 | -                                          |                                           |
|                                           | 195.088                                    | 2  | Gly  | 19 | 2266.097                                   |                                           |
| 324.130                                   | 324.131                                    | 3  | Glu  | 18 | 2209.075                                   |                                           |
| 487.194                                   | 487.194                                    | 4  | Tyr  | 17 | 2080.033                                   |                                           |
| 558.231                                   | 558.231                                    | 5  | Ala  | 16 | 1916.969                                   |                                           |
| 705.266                                   | 705.267                                    | 6  | Met* | 15 | 1845.932                                   |                                           |
| 792.298                                   | 792.299                                    | 7  | Ser  | 14 | 1698.897                                   |                                           |
| 905.383                                   | 905.383                                    | 8  | Ile  | 13 | 1611.865                                   |                                           |
| 1068.446                                  | 1068.446                                   | 9  | Tyr  | 12 | 1498.781                                   | 1498.778                                  |
| 1182.489                                  | 1182.489                                   | 10 | Asn  | 11 | 1335.717                                   | 1335.716                                  |
|                                           | 1279.542                                   | 11 | Pro  | 10 | 1221.674                                   | 1221.675                                  |
| 1392.625                                  | 1392.626                                   | 12 | Leu  | 9  | 1124.622                                   | 1124.622                                  |
| 1491.695                                  | 1491.694                                   | 13 | Val  | 8  | 1011.538                                   | 1011.583                                  |
| 1606.719                                  | 1606.721                                   | 14 | Asp  | 7  | 912.469                                    | 912.469                                   |
| 1705.793                                  | 1705.790                                   | 15 | Val  | 6  | 797.442                                    | 797.443                                   |
|                                           | 1891.869                                   | 16 | Trp  | 5  | 698.374                                    | 698.374                                   |
|                                           | 2028.928                                   | 17 | His  | 4  | 512.295                                    | 512.294                                   |
|                                           | 2115.960                                   | 18 | Ser  | 3  | 375.236                                    | 375.235                                   |
|                                           | 2229.044                                   | 19 | Leu  | 2  | 288.204                                    |                                           |
|                                           | -                                          | 20 | Arg  | 1  | 175.120                                    |                                           |

| Doubly-charged b-ions <i>m/z</i> observed | Doubly-charged b-ions <i>m/z</i> predicted |    |      |    | Doubly-charged y-ions <i>m/z</i> predicted | Doubly-charged y-ions <i>m/z</i> observed |
|-------------------------------------------|--------------------------------------------|----|------|----|--------------------------------------------|-------------------------------------------|
|                                           | 69.537                                     | 1  | His  | 20 | -                                          |                                           |
|                                           | 98.048                                     | 2  | Gly  | 19 | 1133.552                                   |                                           |
|                                           | 162.569                                    | 3  | Glu  | 18 | 1105.042                                   | 1105.042                                  |
|                                           | 244.101                                    | 4  | Tyr  | 17 | 1040.520                                   | 1040.520                                  |
|                                           | 279.620                                    | 5  | Ala  | 16 | 958.989                                    | 958.987                                   |
|                                           | 353.137                                    | 6  | Met* | 15 | 923.470                                    | 923.469                                   |
|                                           | 396.653                                    | 7  | Ser  | 14 | 849.952                                    | 849.952                                   |
|                                           | 453.195                                    | 8  | Ile  | 13 | 806.436                                    |                                           |
|                                           | 534.727                                    | 9  | Tyr  | 12 | 749.894                                    | 749.894                                   |
| 591.748                                   | 591.748                                    | 10 | Asn  | 11 | 668.363                                    | 668.362                                   |
| 640.274                                   | 640.275                                    | 11 | Pro  | 10 | 611.341                                    | 611.341                                   |
| 696.817                                   | 696.817                                    | 12 | Leu  | 9  | 562.815                                    |                                           |
| 746.351                                   | 746.351                                    | 13 | Val  | 8  | 506.273                                    | 506.272                                   |
|                                           | 803.865                                    | 14 | Asp  | 7  | 456.739                                    | 456.738                                   |
| 853.397                                   | 853.399                                    | 15 | Val  | 6  | 399.225                                    |                                           |
| 996.438                                   | 946.438                                    | 16 | Trp  | 5  | 349.691                                    | 349.690                                   |
| 1014.967                                  | 1014.968                                   | 17 | His  | 4  | 256.651                                    |                                           |
|                                           | 1058.484                                   | 18 | Ser  | 3  | 188.122                                    |                                           |
|                                           | 1115.026                                   | 19 | Leu  | 2  | 144.606                                    |                                           |
|                                           | -                                          | 20 | Arg  | 1  | 88.064                                     |                                           |

**Supporting Information Table 2.** Table of theoretical and measured b- and y-type ions, from the low energy MS/MS spectrum shown in Supporting Information Figure 4. The table was used for manual *de novo* sequencing of *V. vulgaris* peptide AIEKPFLVVYDEDGK as a triply-charged precursor.

| Singly-charged b-ions <i>m/z</i> observed | Singly-charged b-ions <i>m/z</i> predicted |    |     |    | Singly-charged y-ions <i>m/z</i> predicted | Singly-charged y-ions <i>m/z</i> observed |
|-------------------------------------------|--------------------------------------------|----|-----|----|--------------------------------------------|-------------------------------------------|
|                                           | 72.045                                     | 1  | Lys | 15 | -                                          |                                           |
|                                           | 185.129                                    | 2  | Gly | 14 | 1651.858                                   |                                           |
| 314.171                                   | 314.172                                    | 3  | Asp | 13 | 1538.774                                   |                                           |
| 442.266                                   | 442.267                                    | 4  | Glu | 12 | 1409.732                                   | 1409.724                                  |
| 539.319                                   | 539.319                                    | 5  | Asp | 11 | 1281.637                                   | 1281.632                                  |
| 686.387                                   | 686.388                                    | 6  | Tyr | 10 | 1184.584                                   | 1184.579                                  |
| 799.470                                   | 799.472                                    | 7  | Val | 9  | 1037.516                                   | 1037.512                                  |
| 898.538                                   | 898.540                                    | 8  | Val | 8  | 924.431                                    | 924.429                                   |
| 997.606                                   | 997.609                                    | 9  | Leu | 7  | 825.363                                    | 825.361                                   |
| 1160.668                                  | 1160.672                                   | 10 | Phe | 6  | 726.295                                    | 726.293                                   |
| 1275.695                                  | 1275.699                                   | 11 | Pro | 5  | 563.231                                    | 563.230                                   |
| 1404.736                                  | 1404.741                                   | 12 | Lys | 4  | 448.204                                    | 448.204                                   |
| 1519.762                                  | 1519.768                                   | 13 | Glu | 3  | 319.162                                    |                                           |
| 1576.778                                  | 1576.790                                   | 14 | Leu | 2  | 204.135                                    |                                           |
|                                           | -                                          | 15 | Ala | 1  | 147.113                                    |                                           |

| Doubly-charged b-ions <i>m/z</i> observed | Doubly-charged b-ions <i>m/z</i> predicted |    |     |    | Doubly-charged y-ions <i>m/z</i> predicted | Doubly-charged y-ions <i>m/z</i> observed |
|-------------------------------------------|--------------------------------------------|----|-----|----|--------------------------------------------|-------------------------------------------|
|                                           | 36.526                                     | 1  | Lys | 15 | -                                          |                                           |
|                                           | 93.068                                     | 2  | Gly | 14 | 826.433                                    |                                           |
|                                           | 157.590                                    | 3  | Asp | 13 | 769.891                                    | 769.890                                   |
|                                           | 221.637                                    | 4  | Glu | 12 | 705.370                                    | 705.368                                   |
|                                           | 270.164                                    | 5  | Asp | 11 | 641.322                                    |                                           |
|                                           | 343.698                                    | 6  | Tyr | 10 | 592.796                                    |                                           |
|                                           | 400.240                                    | 7  | Val | 9  | 519.262                                    |                                           |
|                                           | 449.774                                    | 8  | Val | 8  | 462.720                                    |                                           |
|                                           | 499.308                                    | 9  | Leu | 7  | 413.185                                    |                                           |
|                                           | 580.840                                    | 10 | Phe | 6  | 363.651                                    |                                           |
|                                           | 638.353                                    | 11 | Pro | 5  | 282.120                                    |                                           |
|                                           | 702.875                                    | 12 | Lys | 4  | 224.606                                    |                                           |
|                                           | 760.388                                    | 13 | Glu | 3  | 160.085                                    |                                           |
|                                           | 788.899                                    | 14 | Leu | 2  | 102.571                                    |                                           |
|                                           | -                                          | 15 | Ala | 1  | 74.061                                     |                                           |
